# Supplementary material for: End-Users and Caregivers’ Involvement in Health Interventional Research Carried Out in Geriatric Facilities: A Systematic Review
Source: MDPI journal article supplement (doi:10.3390/ijerph16162812), 2019-08-07
Supplement: s1 [file s1]

**Table S1:** Query combinations

- (Nursing home\*[Ti] AND (education\*[Ti] OR intervention\*[Ti] OR stewardship\*[Ti] OR training\*[Ti] OR learning\*[Ti])) OR
- (long-term care [Ti] AND (education\*[Ti] OR intervention\*[Ti] OR stewardship\*[Ti] OR training\*[Ti] OR learning\*[Ti])) OR
- (residential aged\*[Ti] AND (education\*[Ti] OR intervention\*[Ti] OR stewardship\*[Ti] OR training\*[Ti] OR learning\*[Ti])) OR
- (residential care home\*[Ti] AND (education\*[Ti] OR intervention\*[Ti] OR stewardship\*[Ti] OR training\*[Ti] OR learning\*[Ti])) OR
- (care home\*[Ti] AND (education\*[Ti] OR intervention\*[Ti] OR stewardship\*[Ti] OR training\*[Ti] OR learning\*[Ti]))
